# Supplementary material
Source: MDPI journal article supplement (https://www.mdpi.com/2073-4433/12/11/1411)
Supplement: s1 [file s1]

# Supplementary Materials: Spatial Distributions of Atmospheric Ammonia in a Rural Area in South Korea and the Associated Impact on a Nearby Urban Area

Sangmin Oh<sup>1</sup>, Seung-Gi Kim<sup>1</sup>, Jae Bong Lee<sup>2</sup>, Junsu Park<sup>1</sup>, Joon-Bum Jee<sup>3</sup>, Se-Woon Hong<sup>4</sup>, Kyeong-Seok Kwon<sup>5</sup>, Mijung Song<sup>1,6,\*</sup>

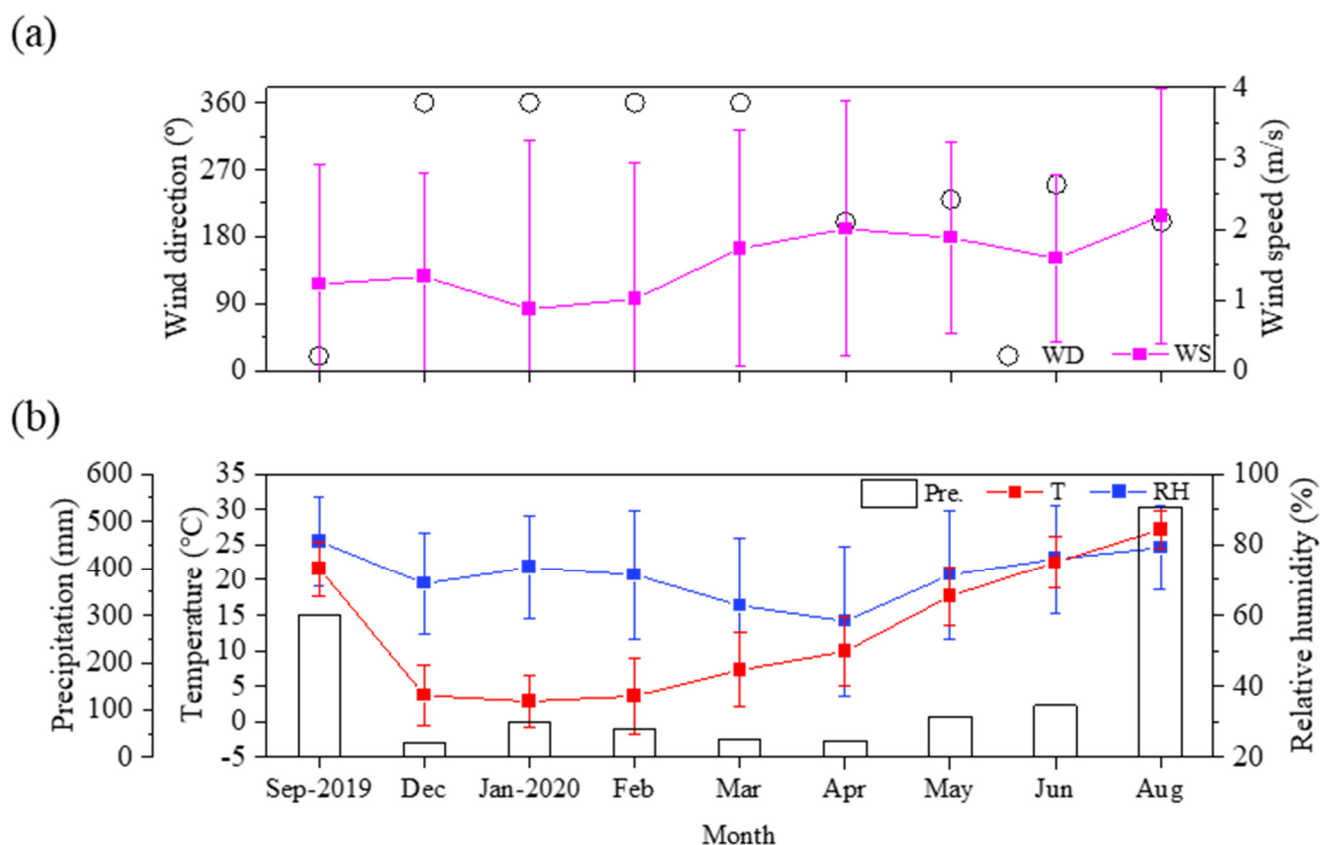

**Figure S1.** Monthly meteorological conditions of (a) wind direction (WD) and wind speed (WS), and (b) cumulative precipitation (Pre.), temperature (T), and relative humidity (RH) at Jeongeup in the rural area from September 2019 to August 2020.

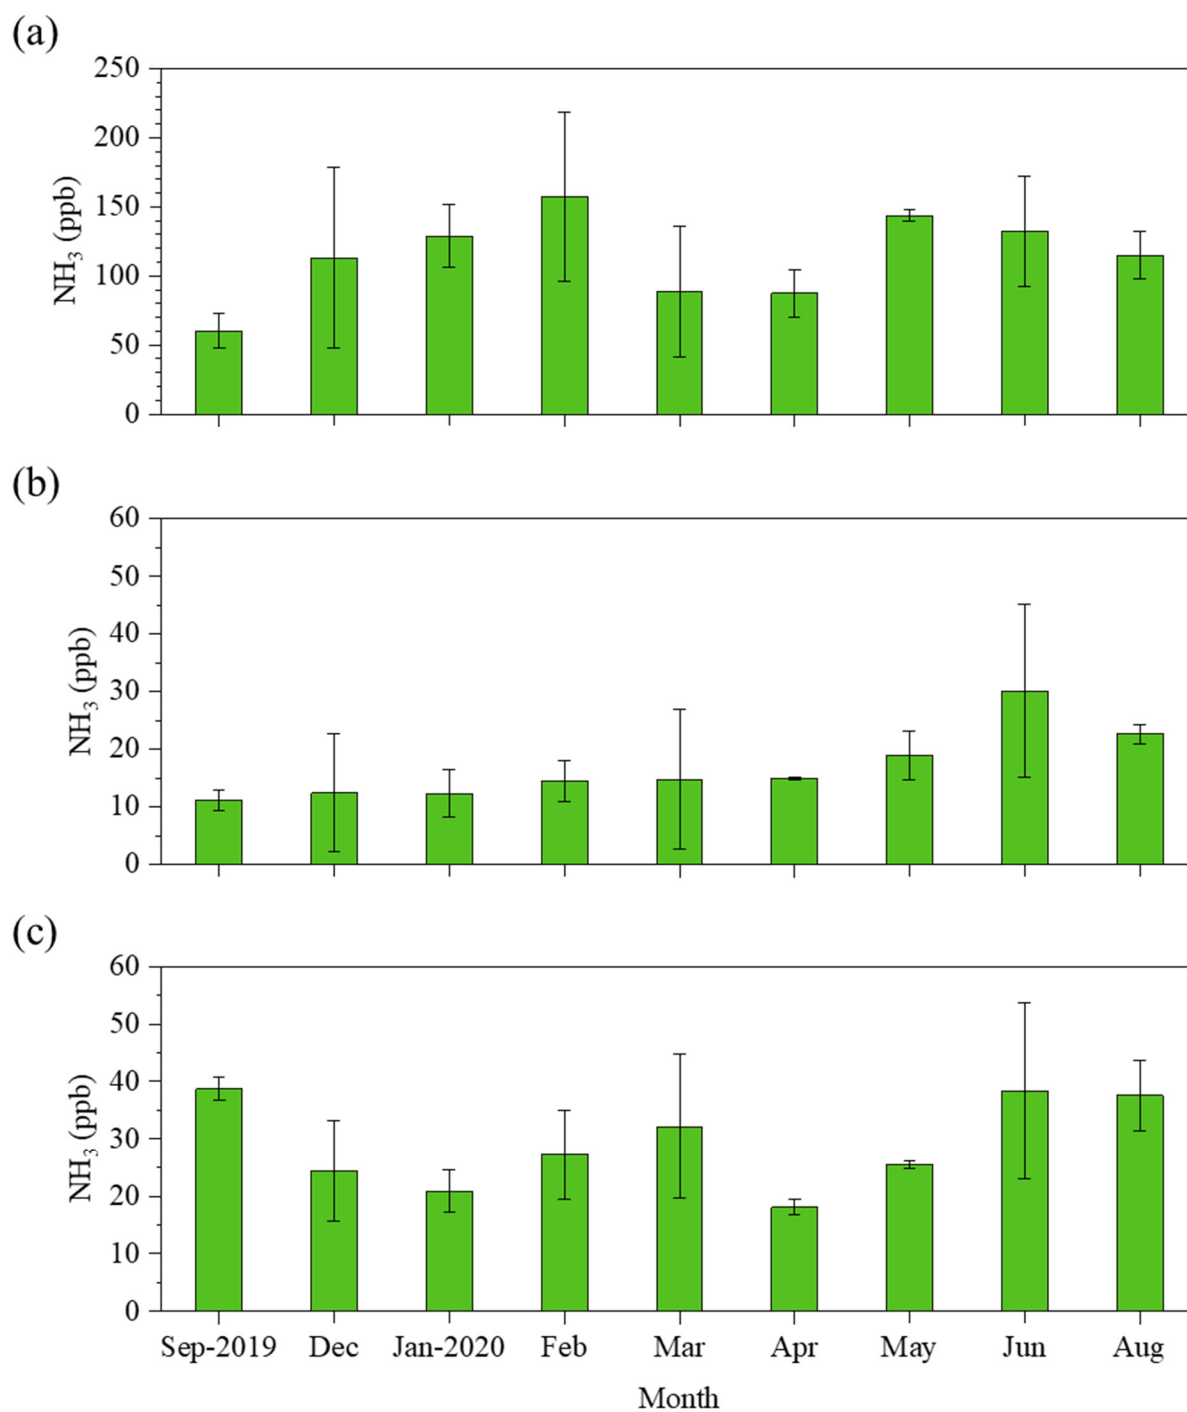

**Figure S2.** Monthly variations in ambient  $\text{NH}_3$  concentrations with standard deviations at the monitoring sites of (a) R1, (b) R2, and (c) R3 in a rural area during September 2019 - August 2020.

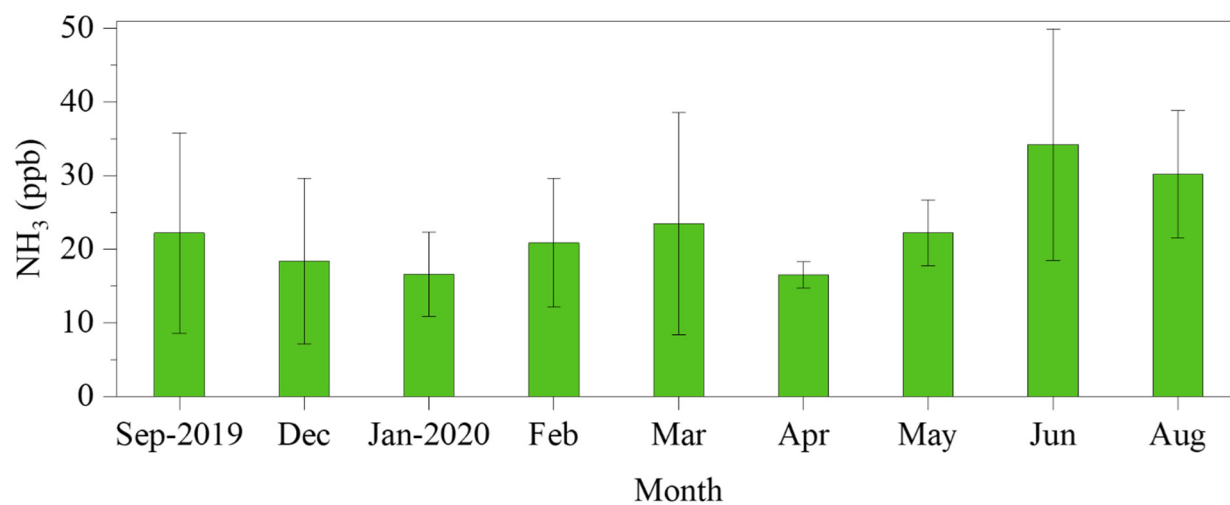

**Figure S3.** Monthly variations in ambient  $\text{NH}_3$  concentrations averaged at the rural sites R2 and R3 during September 2019–August 2020.

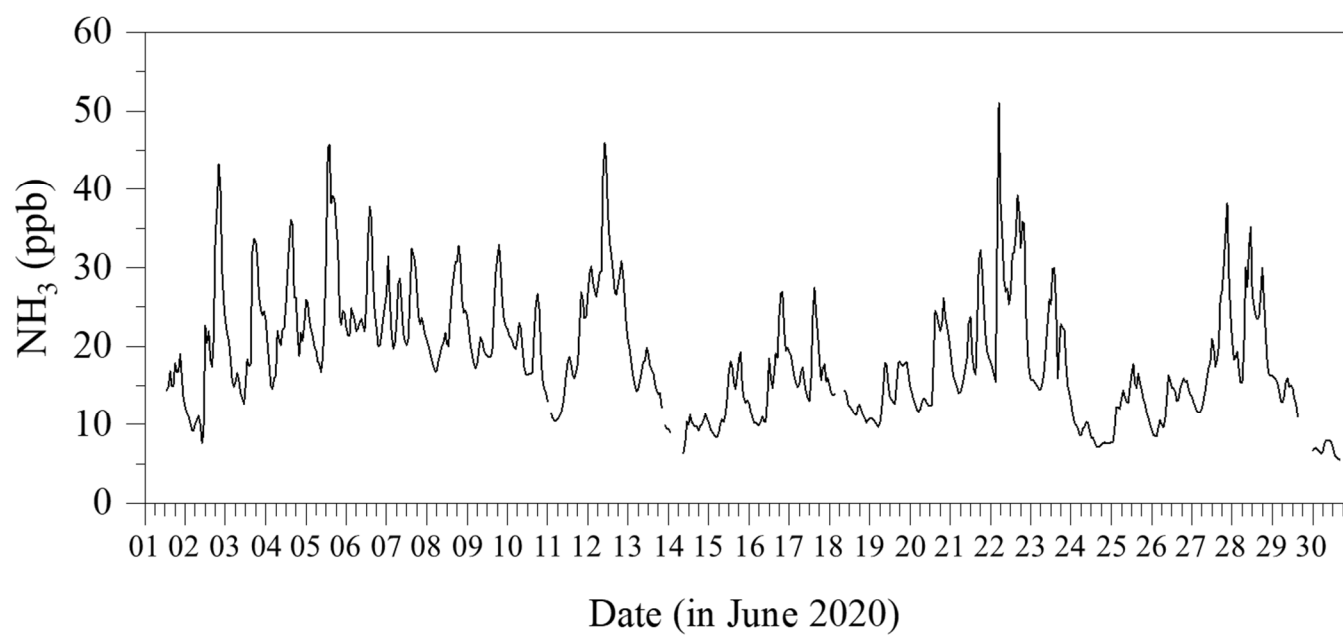

**Figure S4.** Time series of hourly mean NH<sub>3</sub> concentrations measured at the urban (Jeonju) during 1-30 June 2020.

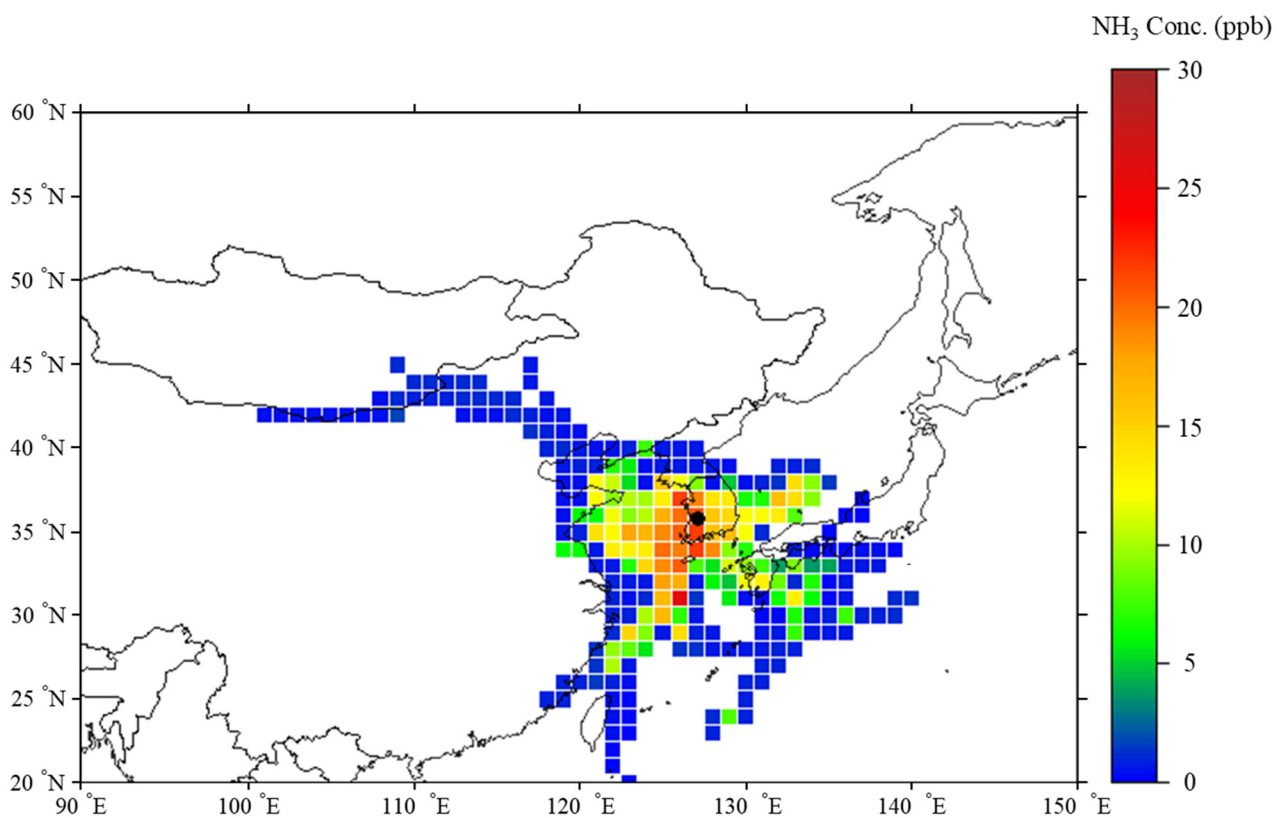

**Figure S5.** Concentration weighted trajectory (CWT) of grid cells (1° × 1°) at 90<sup>th</sup> percentile for ambient NH<sub>3</sub> in urban (Jeonju) during June 2020. The color bar indicates ambient NH<sub>3</sub> concentrations.
